# Supplementary material for: An ABCA4 loss-of-function mutation causes a canine form of Stargardt disease
Source: PubMed Central journal article supplement (PMC6424408; doi:10.1371/journal.pgen.1007873), 2019-03-19

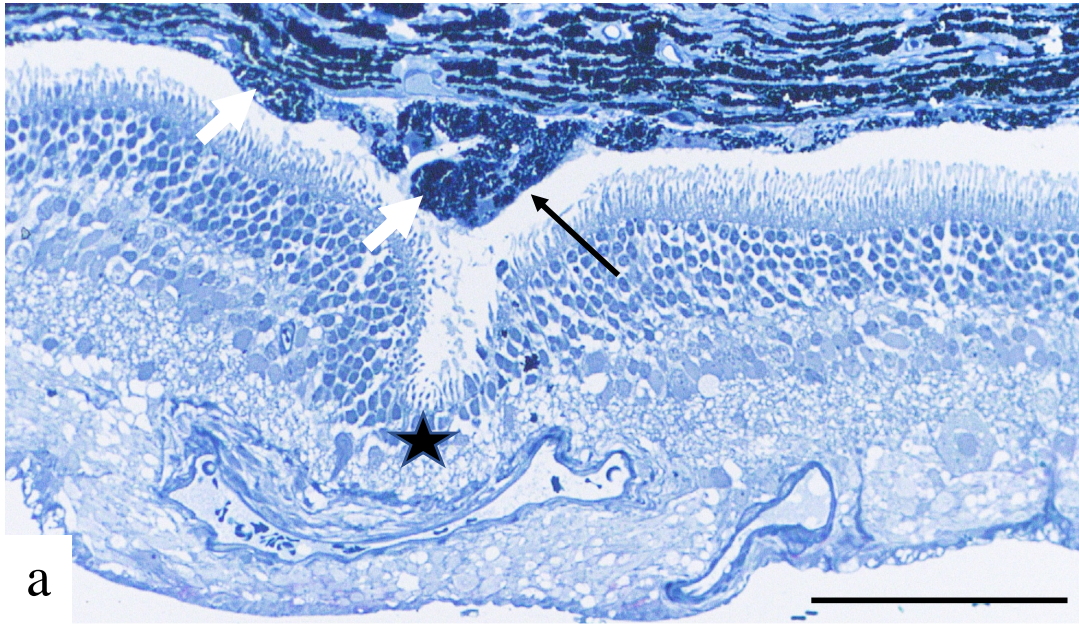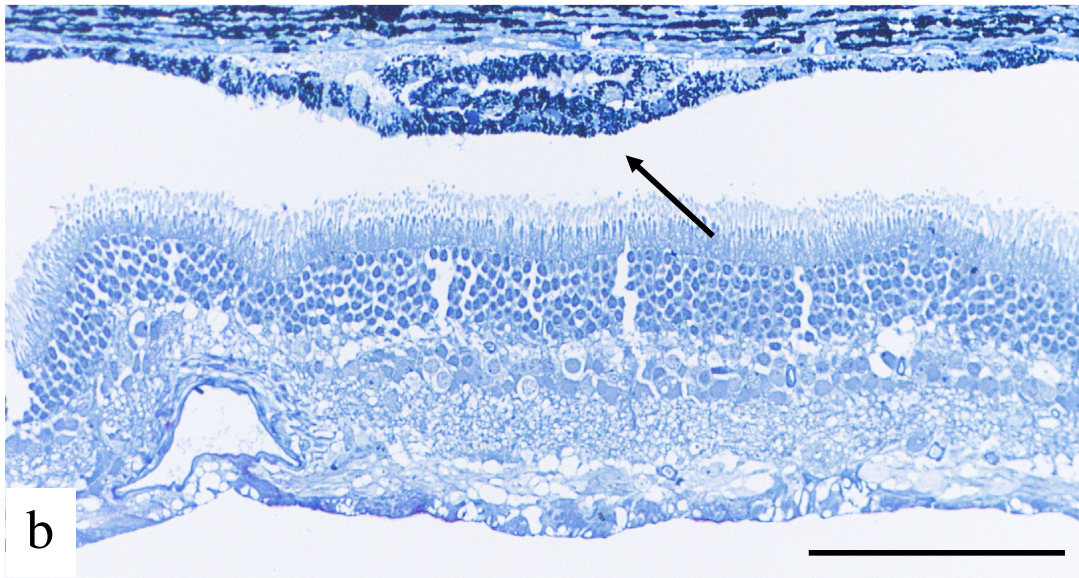

Supplement: pgen.1007873.s003.pdf [file pgen.1007873.s003.pdf]
