# Supplementary material for: An ABCA4 loss-of-function mutation causes a canine form of Stargardt disease
Source: PLoS Genet. 2019 Mar 19;15(3):e1007873. doi: 10.1371/journal.pgen.1007873 (PMC6424408; doi:10.1371/journal.pgen.1007873)
Supplement: S3 Table — Coding sequence variants identified as private for the Labrador retriever family and the predicted effect of the variants based on Polyphen-2 and PROVEAN scores. (XLSX) [file pgen.1007873.s007.xlsx]

## Sheet: S3_Table
S3 Table. List of candidate variants from WGS. Coding sequence variants identified as private for the Labrador retriever family and the predicted effect of the variants based on Polyphen-2 and PROVEAN scores.
Variant_nr	Gene_nr	Ensembl_gene_id	Gene_name	Description	Chr	Position_start	Position_end	Reference_nt	Variant_nt	Ensembl_transcript_id	Exon	Variant (c.)	Variant (p.)	Polyphen2_score	PROVEAN_score
Nonsynonymous SNV
1	1	ENSCAFG00000010228	C2CD2	C2 calcium dependent domain containing 2	31	36295441	36295441	C	T	ENSCAFT00000016235	exon14	G1991A	R664Q	BENIGN 0.396	-2.243 Neutral
2	2	ENSCAFG00000004574	GIMAP1	GTPase, IMAP family member 1	16	14793960	14793960	C	A	ENSCAFT00000007373	exon2	G805T	V269L	Unknown	0.099 Neutral
3	3	ENSCAFG00000011011	HEPACAM	hepatic and glial cell adhesion molecule	5	9531601	9531601	A	G	ENSCAFT00000017511	exon2	A104G	N35S	PROBABLY DAMAGING 0.988	-2.222 Neutral
4	4	ENSCAFG00000002519	ITGB8	integrin subunit beta 8	14	34436048	34436048	A	T	ENSCAFT00000003980	exon10	A1481T	N494I	BENIGN 0.108	-2.569 Deletorious
5	5	ENSCAFG00000004115	KIAA1549	KIAA1549	16	9755342	9755342	C	T	ENSCAFT00000006593	exon2	C2579T	S860L	BENIGN 0.065	-2.333 Neutral
6	6	ENSCAFG00000006103	NEK11	NIMA related kinase 11	23	28355231	28355231	G	T	ENSCAFT00000009895	exon13	G1289T	R430L	BENIGN 0.004	0.104 Neutral
7	7	ENSCAFG00000009907	NTM	neurotrimin	5	2895430	2895430	T	G	ENSCAFT00000015815	exon1	A196C	N66H	BENIGN 0.054	-0.681 Neutral
7 (isoform2)	7	ENSCAFG00000009907	NTM	neurotrimin	5	2895430	2895430	T	G	ENSCAFT00000043886	exon2	A232C	N78H	BENIGN 0.054	-0.673 Neutral
8	8a	ENSCAFG00000029932	OR2A12	olfactory receptor family 2 subfamily A member 12	16	5809808	5809808	T	G	ENSCAFT00000045310	exon1	A794C	H265P	BENIGN 0.001	-4.946 Deletorious
9	8b	ENSCAFG00000029932	OR2A12	olfactory receptor family 2 subfamily A member 12	16	5809737	5809737	T	A	ENSCAFT00000045310	exon1	A865T	N289Y	BENIGN 0	7.440 Neutral
10	8c	ENSCAFG00000029932	OR2A12	olfactory receptor family 2 subfamily A member 12	16	5809905	5809905	G	A	ENSCAFT00000045310	exon1	C697T	R233C	POSSIBLY DAMAGING 0.705	-6.912 Deletorious
11	8d	ENSCAFG00000029932	OR2A12	olfactory receptor family 2 subfamily A member 12	16	5809827	5809827	G	T	ENSCAFT00000045310	exon1	C775A	L259M	BENIGN 0.003	1.622 Neutral
12	9	ENSCAFG00000003800	PPFIA3	PTPRF interacting protein alpha 3	1	107316134	107316134	G	A	ENSCAFT00000006161	exon21	C2453T	S818L	BENIGN 0.068	-0.323 Neutral
13	10	ENSCAFG00000002511	TWISTNB	TWIST neighbor	14	33846199	33846199	T	G	ENSCAFT00000003964	exon4	A832C	K278Q	Unknown	-1.269 Neutral
13 (isoform2)	10	ENSCAFG00000002511	TWISTNB	TWIST neighbor	14	33846199	33846199	T	G	ENSCAFT00000045053	exon4	A913C	K305Q	POSSIBLY DAMAGING 0.816	-1.269 Neutral
14	11a	ENSCAFG00000010731	USH2A	usherin	38	11342066	11342066	G	A	ENSCAFT00000017072	exon43	C7244T	P2415L	PROBABLY DAMAGING 0.97	-4.933 Deletorious
15	11b	ENSCAFG00000010731	USH2A	usherin	38	11244630	11244630	C	T	ENSCAFT00000017072	exon54	G9652A	A3218T	BENIGN 0.001	0.394 Neutral
16	11c	ENSCAFG00000010731	USH2A	usherin	38	11207434	11207434	C	T	ENSCAFT00000017072	exon61	G10844A	S3615N	BENIGN 0	-0.269 Neutral
17	12	ENSCAFG00000011242	novel_gene	olfactory receptor	5	9872669	9872669	A	G	ENSCAFT00000017860	exon1	A877G	K293E	POSSIBLY DAMAGING 0.858	-2.827 Deletorious
18	13	ENSCAFG00000011258	novel_gene	cOR8C4, olfactory receptor	5	9976398	9976398	A	G	ENSCAFT00000017883	exon2	T218C	F73S	BENIGN 0.304	-5.881 Deletorious
Nonframeshift deletion
1	1	ENSCAFG00000003597	SCAF1	SR-related CTD associated factor 1	1	106883624	106883629	CTCCTC	-	ENSCAFT00000005794	exon8	3130_3135del	1044_1045del	NA	-1.789 Neutral
1 (isoform2)	1	ENSCAFG00000003597	SCAF1	SR-related CTD associated factor 1	1	106883624	106883629	CTCCTC	-	ENSCAFT00000047520	exon6	3133_3138del	1045_1046del	NA	-2.088 Neutral
Frameshift deletion
2	2	ENSCAFG00000003812	TRBV13	T Cell Receptor Beta Variable 13	16	6895920	6895920	G	-	ENSCAFT00000047863	exon2	283delC	L95fs	NA	NA
2 (isoform2)	2	ENSCAFG00000003812	TRBV13	T Cell Receptor Beta Variable 13	16	6895920	6895920	G	-	ENSCAFT00000042775	exon2	313delC	L105fs	NA	NA
Frameshift insertion
3	3	ENSCAFG00000020121	ABCA4	retinal-specific ATP-binding cassette transporter	6	55146549	55146549	-	C	ENSCAFT00000005367	exon28	4170dupC*	V1390fs	NA	NA
13 (isoform2)	3	ENSCAFG00000020121	ABCA4	retinal-specific ATP-binding cassette transporter	6	55146549	55146549	-	C	ENSCAFT00000032029	exon28	4170dupC*	V1390fs	NA	NA
4	4	ENSCAFG00000030298	novel_gene	uncharacterized protein	5	2655617	2655617	-	AT	ENSCAFT00000045921	exon1	84_85insAT	S28fs	NA	NA
*The insertion is found in a cytosine mononucleotide-repeat region and it is arbitrary at what position the actual insertion occurs. In the text we have denoted the insertion as c.4176insC, p.F1393Lfs*1395).
